# Supplementary material for: Muscle Cells Provide Instructions for Planarian Regeneration
Source: PubMed Central journal article supplement (PMC4101538; doi:10.1016/j.celrep.2013.07.022), 2013-08-15
Supplement: NIHMS523206-supplement-01.pdf [file NIHMS523206-supplement-01.pdf]

**Supplemental Table 1. Position control genes used in manuscript**

|                   | signaling pathway | pattern/expression reference                    | patterning RNAi phenotype           | phenotype reference                  |
|-------------------|-------------------|-------------------------------------------------|-------------------------------------|--------------------------------------|
| <i>notum</i>      | WNT               | Petersen 2011                                   | two tails                           | Petersen 2011                        |
| <i>sFRP-1</i>     | WNT               | Petersen 2008, Gurley 2008                      |                                     |                                      |
| <i>sFRP-2</i>     | WNT               | Gurley 2010                                     |                                     |                                      |
| <i>ndl-4</i>      | FGF               | Rink 2009                                       |                                     |                                      |
| <i>ndl-3</i>      | FGF               | Rink 2009                                       |                                     |                                      |
| <i>ndk</i>        | FGF               | Cebria 2002                                     | brain/eye expansion                 | Cebria 2002                          |
| <i>wnt2</i>       | WNT               | Petersen 2008                                   |                                     |                                      |
| <i>wntA</i>       | WNT               | Kobayashi 2007, Adell 2009                      | brain/eye expansion                 | Kobayashi 2007, Adell 2009           |
| <i>wntP-2</i>     | WNT               | Petersen 2008, Petersen 2009, Gurley 2010       | synergistic with <i>wnt1</i>        | Petersen 2009                        |
| <i>wnt11-1</i>    | WNT               | Petersen 2008, Gurley 2010                      |                                     |                                      |
| <i>wnt11-2</i>    | WNT               | Adell 2009, Gurley 2010                         | tailless, posterior midline defects | Adell 2009, Gurley 2010              |
| <i>fz-4</i>       | WNT               | Gurley 2008                                     |                                     |                                      |
| <i>wnt1</i>       | WNT               | Petersen 2008                                   | two heads                           | Adell 2009, Petersen 2009            |
| <i>wntless</i>    | WNT               | Adell 2009                                      | two heads                           | Adell 2009                           |
| <i>bmp4</i>       | BMP               | Orii 1998, Molina 2007, Reddien 2007, Orii 2007 | ventralization                      | Molina 2007, Reddien 2007, Orii 2007 |
| <i>nlg-8</i>      | BMP               | Molina 2009                                     | neural ventralization               | Molina 2011                          |
| <i>nlg-7</i>      | BMP               | Molina 2009                                     |                                     |                                      |
| <i>tolloid</i>    | BMP               | Reddien 2007                                    | midline defects                     | Reddien 2007                         |
| <i>admp</i>       | BMP               | Molina 2011, Gaviño 2011                        | synergistic with <i>bmp4</i>        | Gaviño 2011, Molina 2011             |
| <i>nog-1</i>      | BMP               | Molina 2007, Molina 2009                        | dorsalization                       | Molina 2011                          |
| <i>glypican-1</i> | BMP               | Wenemoser 2012                                  | indented heads, midline defects     | Wenemoser 2012                       |
| <i>netrin1</i>    | netrin/dcc        | Cebria 2005                                     |                                     |                                      |
| <i>netrin2</i>    | netrin/dcc        | Cebria 2005                                     | CNS architecture defects            | Cebria 2005                          |
| <i>wnt5</i>       | WNT               | Marsal 2003, Adell 2009                         | deflected brain, ectopic pharynxes  | Adell 2009, Gurley 2010              |
| <i>slit</i>       | slit/robo         | Cebria 2007                                     | midline defects                     | Cebria 2007                          |
